# Supplementary material for: Study of the Effect of Route of Administration of Mesenchymal Stem Cells on Cisplatin-Induced Acute Kidney Injury in Sprague Dawley Rats
Source: PubMed Central journal article supplement — Int J Stem Cells. 2016 May;9(1):79–89. doi: 10.15283/ijsc.2016.9.1.79 (PMC4961107; doi:10.15283/ijsc.2016.9.1.79), 2016-05
Supplement: IJSC-09-079_suppl.pdf [file IJSC-09-079_suppl.pdf]

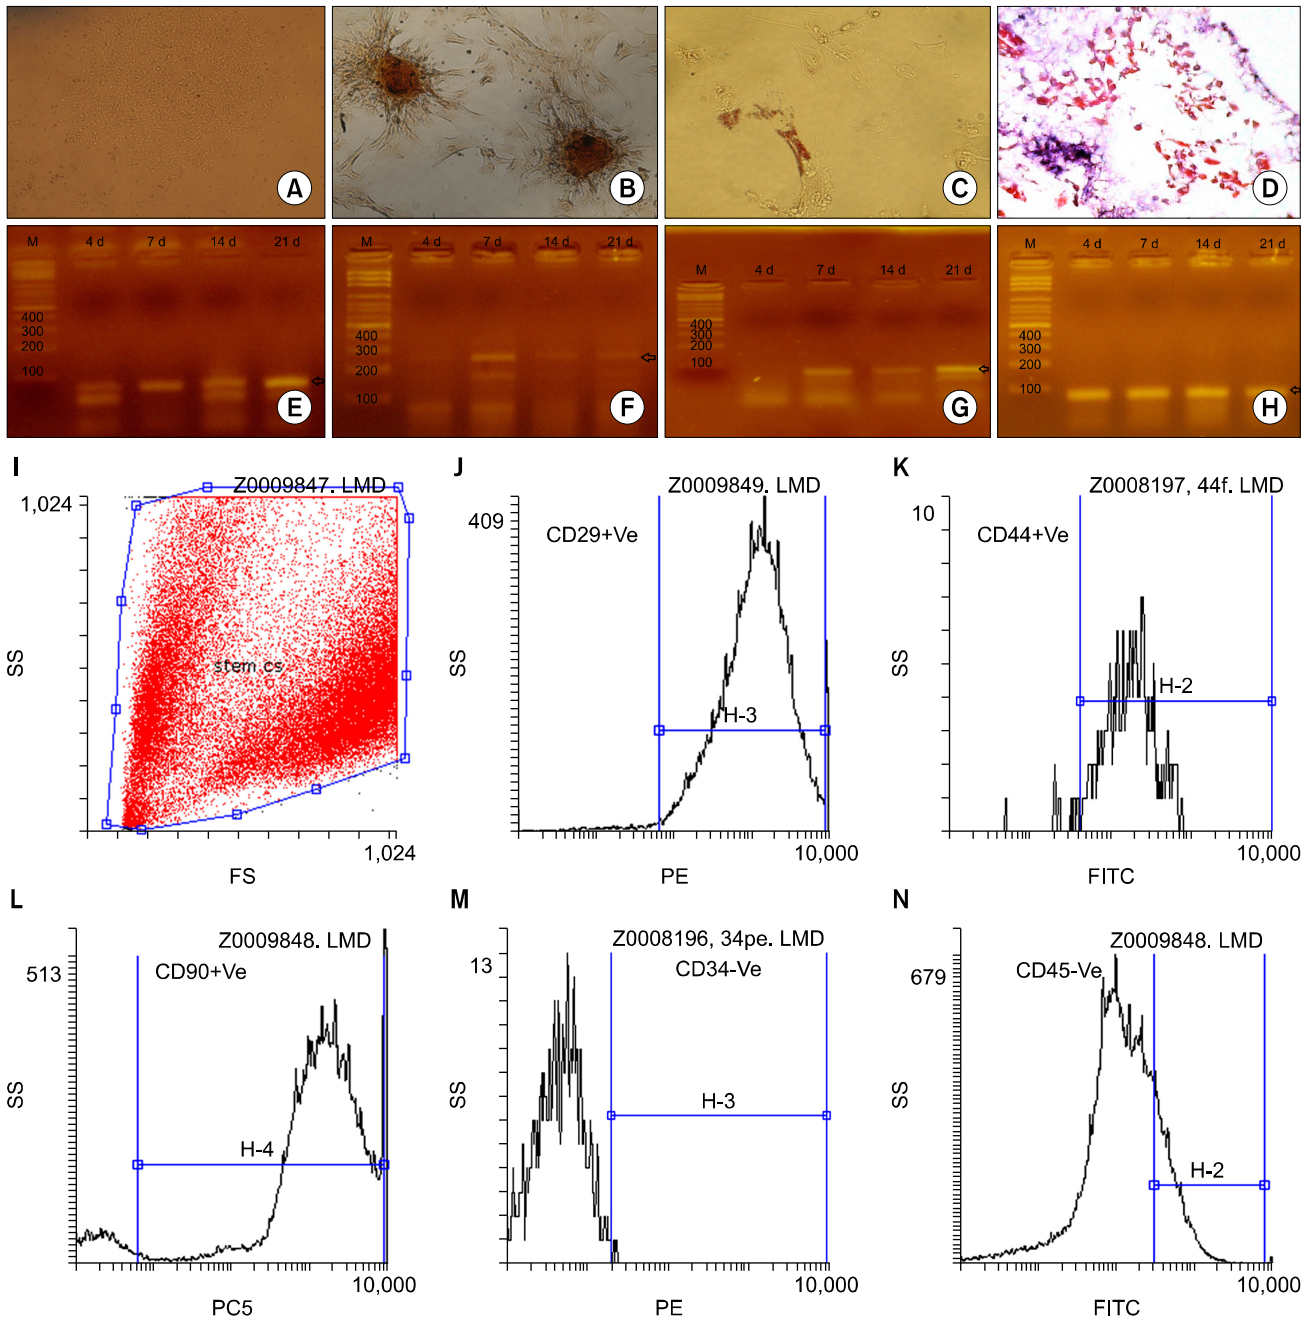

**Fig. S1.** After one week in culture, mesenchymal stem cells (MSCs) were able to form colonies from spindle-shaped fibroblastoid cells (A). MSCs were able to differentiate to osteoblasts, as calcium-rich hydroxyapatite was detected with Alizarin red (B); adipocyte showing intracellular lipid vacuoles revealed by Oil Red O staining (C); and chondroblasts as glycosaminoglycans was visualized using safranin O (D). Using real-time quantitative reverse transcriptase-polymerase chain reaction and Gel electrophoresis, MSCs were positive for adipocytic markers at 4, 7, 14, and 21 days as shown in gel electrophoresis for lipoprotein lipase (E), leptin (F), adiponectin (G), and PPAR- $\gamma$  (H). By flow cytometric analysis (I), MSCs at passage 3 expressed surface antigens CD29 (96.5%) (J), CD44 (93.7%) (K) and CD90 (56.2%) (L) but were negative for CD34 (0.2%) and CD45 (15.2%) (N). Magnification  $\times 100$  (A, C, D);  $\times 200$  (B).
